# Supplementary material
Source: PubMed Central journal article supplement (PMC5864243)
Supplement: 41396_2017_21_MOESM7_ESM.pdf [file 41396_2017_21_MOESM7_ESM.pdf]

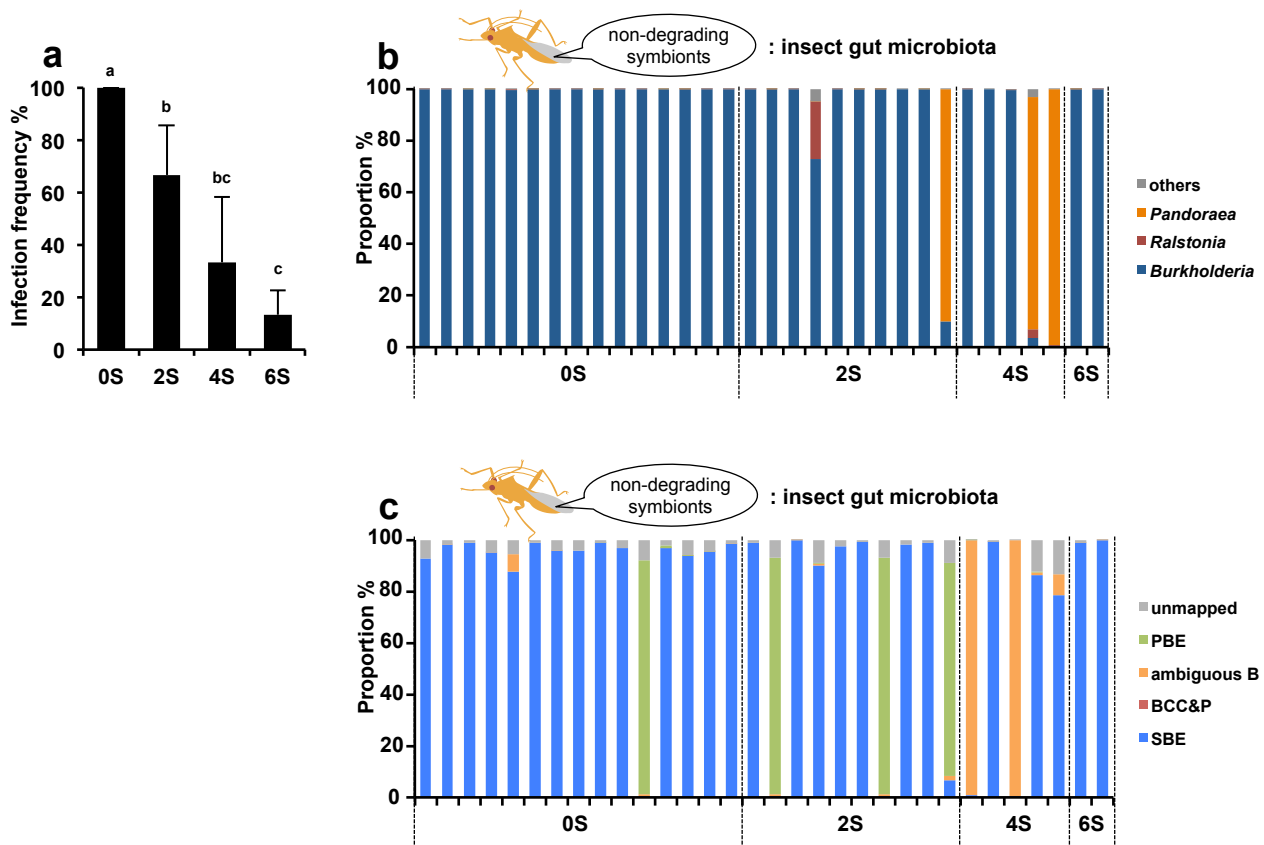

**Supplementary figure S6.** Gut microbiota of insects infected with non-MEP-degrading bacteria. (a) Infection frequency of insects infected with non-MEP-degrading bacteria when the insects were reared on MEP-sprayed soils. Five insects were subjected to a MEP-degradation assay per pot, as described in Materials and methods. Mean  $\pm$  SD ( $n=3$ ). Values with different letter are significantly different ( $p<0.05$ , ANOVA with Tukey's honestly significant difference test). (b, c) Microbial composition of gut microbiota in insects at genus-level (b) and *Burkholderia*-group level (c).
